# Supplementary material for: Propranolol sensitizes prostate cancer cells to glucose metabolism inhibition and prevents cancer progression
Source: PubMed Central journal article supplement (PMC5935740; doi:10.1038/s41598-018-25340-9), 2018-05-04

## Supplementary Information

### Propranolol sensitizes prostate cancer cells to glucose metabolism inhibition and prevents cancer progression.

**Authors:** Laura Brohée<sup>1</sup>, Olivier Peulen<sup>2</sup>, Betty Nusgens<sup>1</sup>, Vincent Castronovo<sup>2</sup>, Marc Thiry<sup>3</sup>, Alain C. Colige<sup>1</sup> and Christophe F. Deroanne<sup>1</sup>

### Uncropped blots

Figure 1(a) upper left

LC3

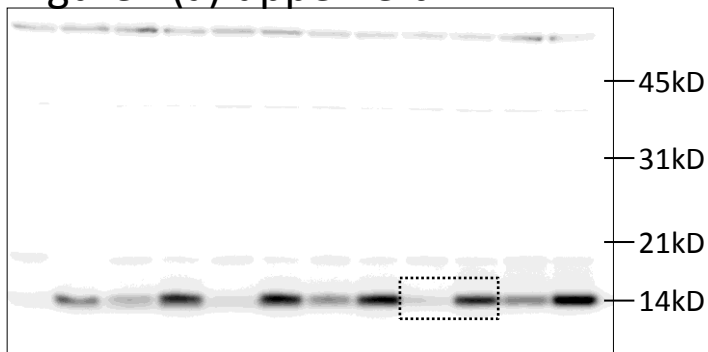

Figure 1(a) upper left

Erk1/2

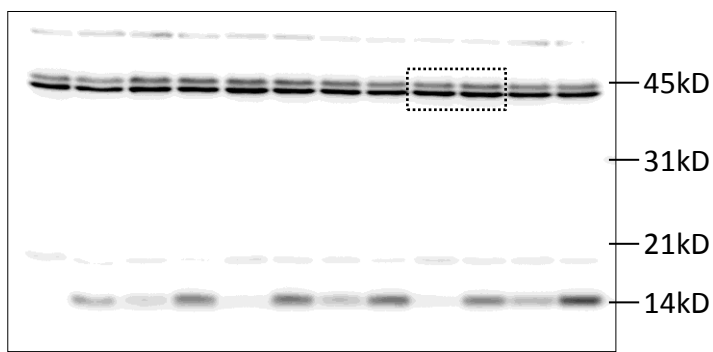

Figure 1(a) lower left

p62

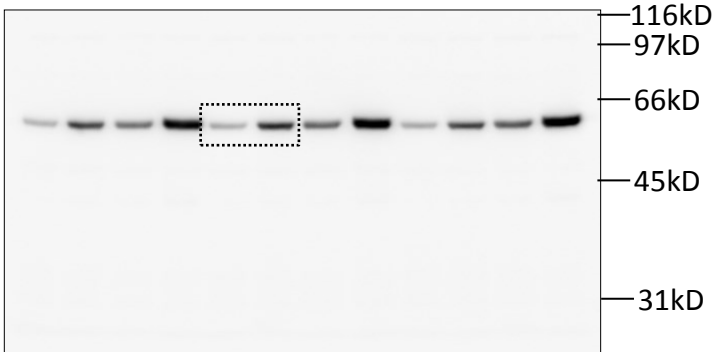

Figure 1(a) lower left

Erk1/2

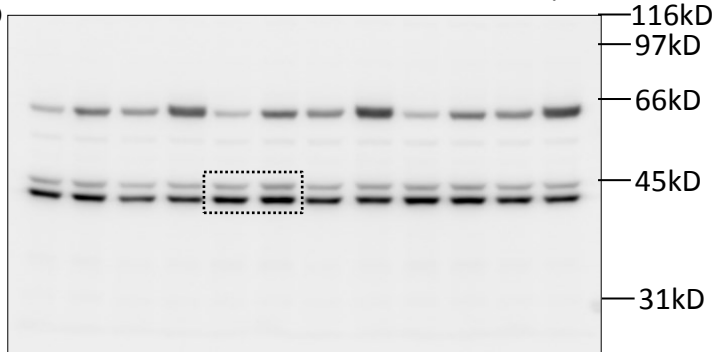

Figure 1(a) upper right

LC3

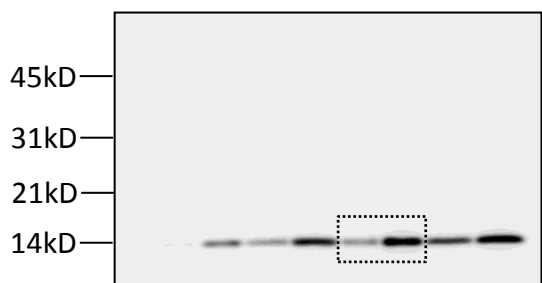

Figure 1(a) upper right

Erk1/2

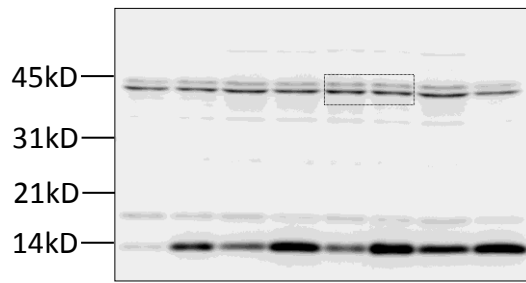

Figure 1(a) lower right

p62

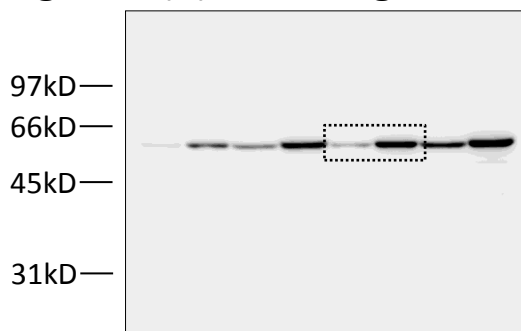

Figure 1(a) lower right

Erk1/2

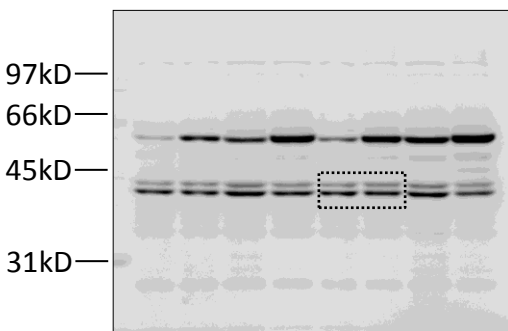

Figure 2(a) upper LC3

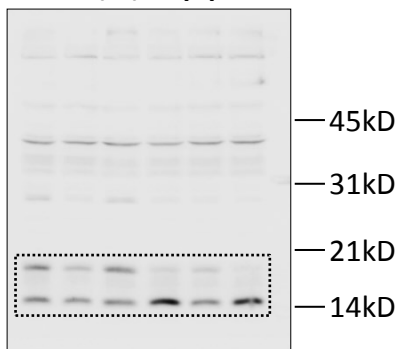

Figure 2(a) upper Erk1/2

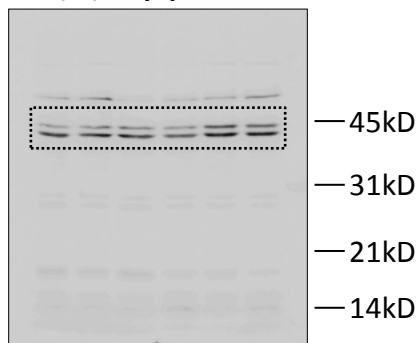

Figure 2(a) lower p62

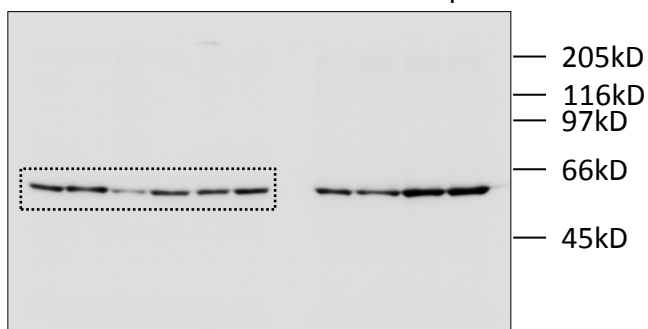

Figure 2(a) lower Erk1/2

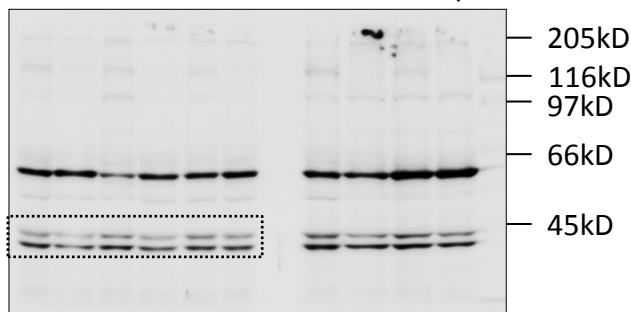

Figure 2(b) upper LC3

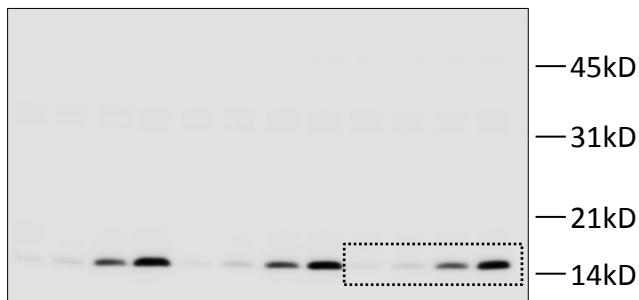

Figure 2(b) upper Erk1/2

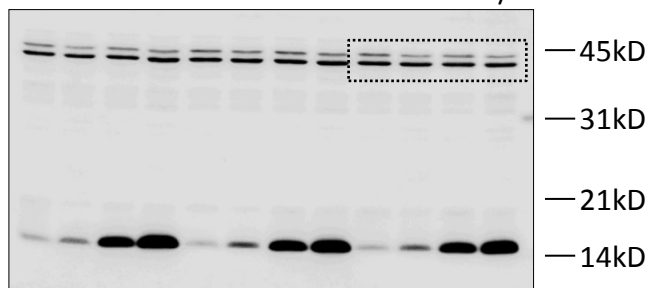

Figure 2(b) lower p62

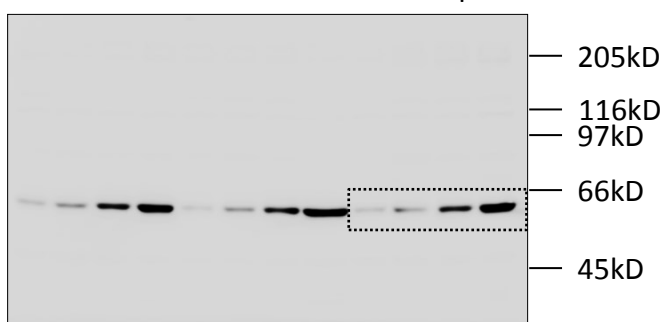

Figure 2(b) lower Erk1/2

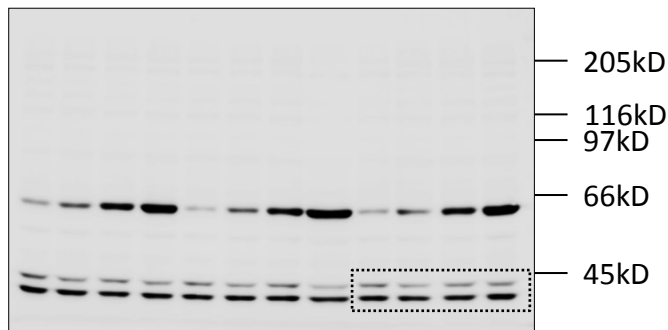

Figure 3(a) upper left

LC3 (24h)

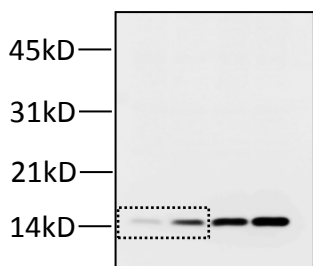

Erk1/2 (24h)

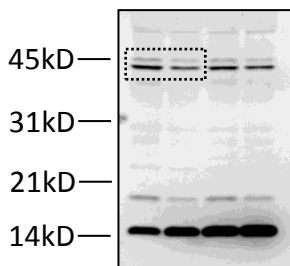

Figure 3(a) upper right

LC3 (48h)

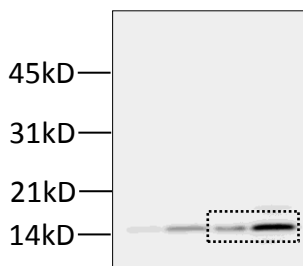

Erk1/2 (48h)

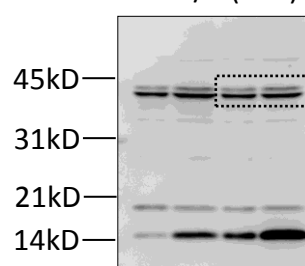

Figure 3(a) lower left

p62 (24h)

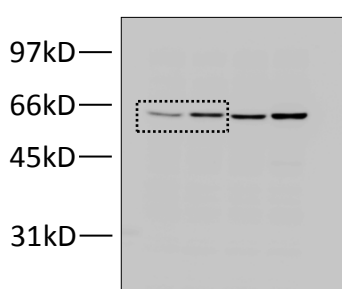

Erk1/2 (24h)

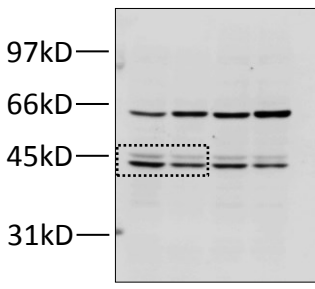

Figure 3(a) lower right

p62 (48h)

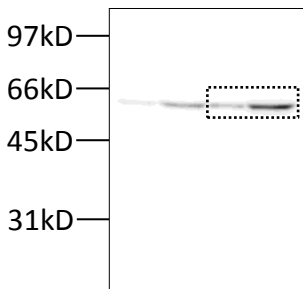

Erk1/2 (48h)

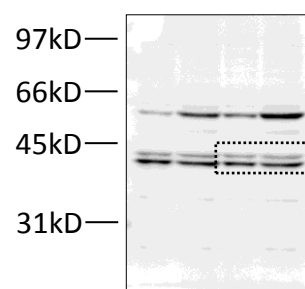

Figure 3(b) upper LC3

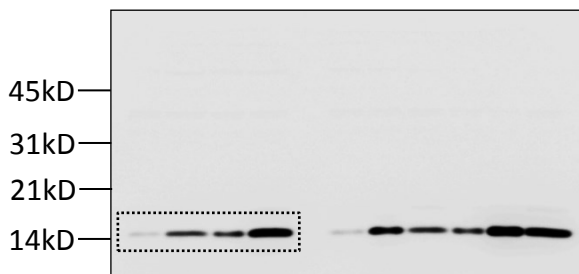

Figure 3(b) upper Erk1/2

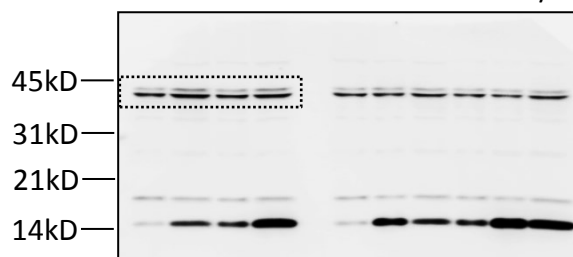

Figure 3(b) lower p62

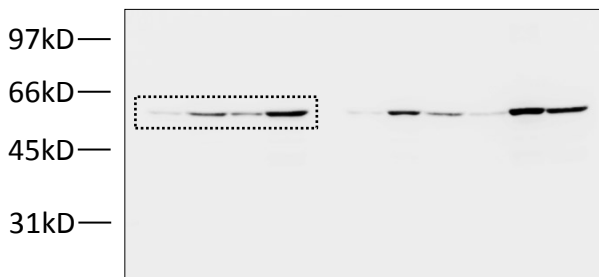

Figure 3(b) lower Erk1/2

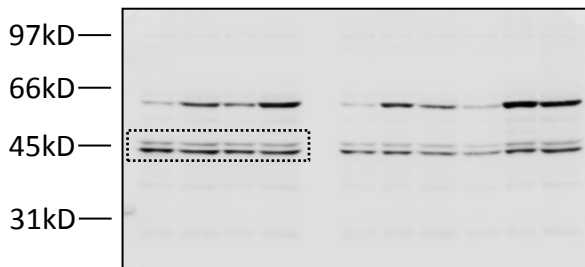

Figure 5(a) upper

LC3

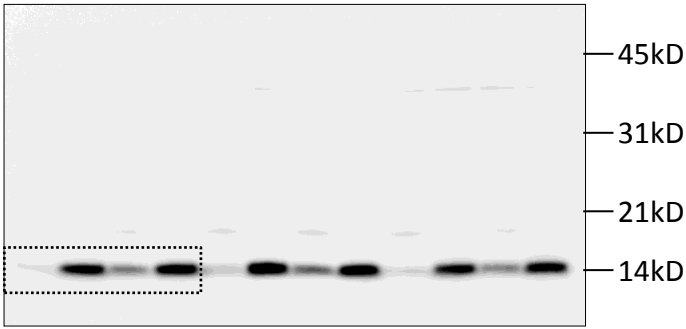

Figure 5(a) upper

Erk1/2

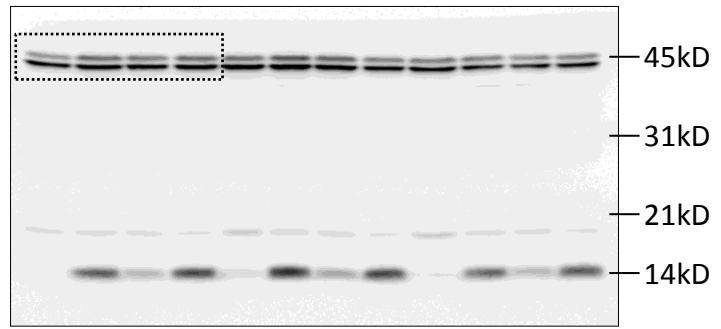

Figure 5(a) lower

p62

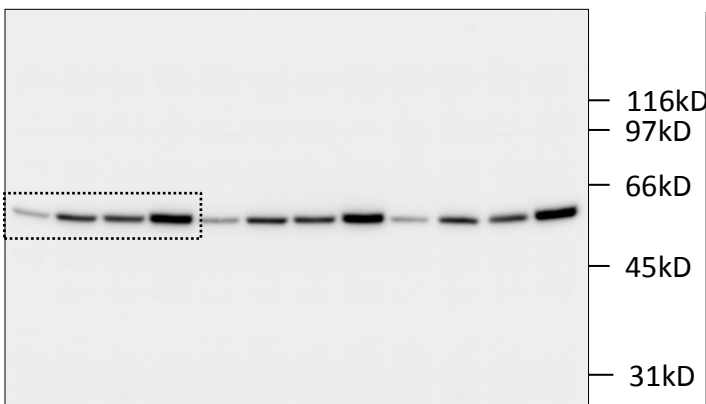

Figure 5(a) lower

Erk1/2

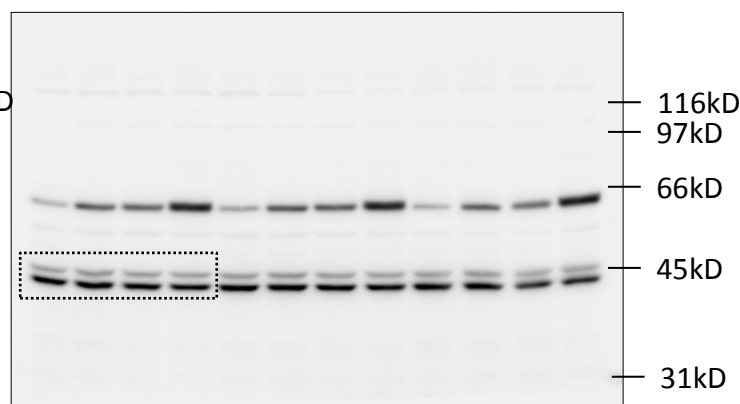

Figure 5(b) upper

LC3

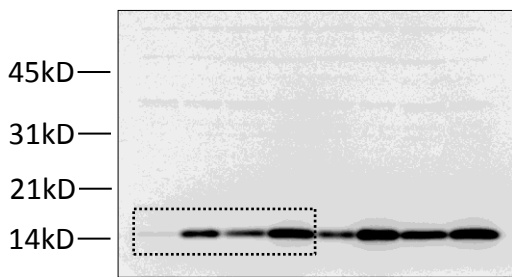

Figure 5(b) upper

Erk1/2

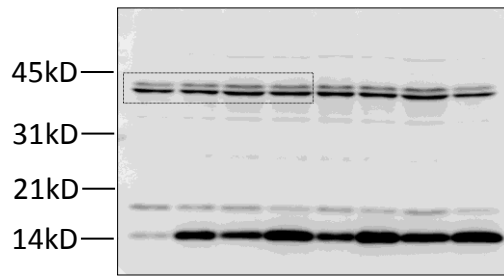

Figure 5(b) lower

p62

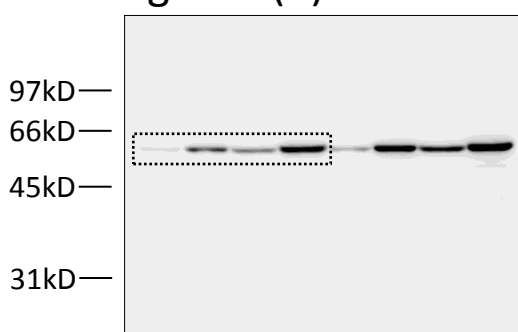

Figure 5(b) lower

Erk1/2

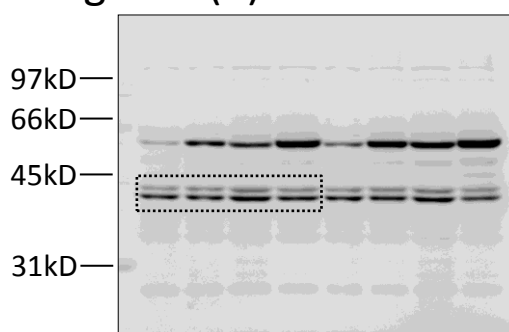

Figure 6(c)

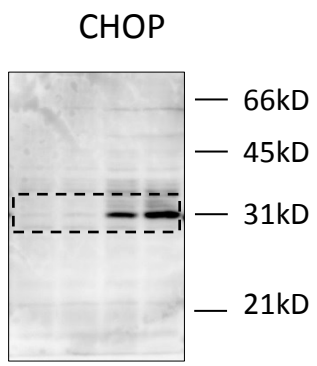

Figure 6(c)

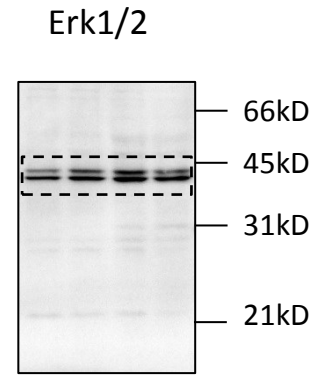

Figure 6(d)

GRP78

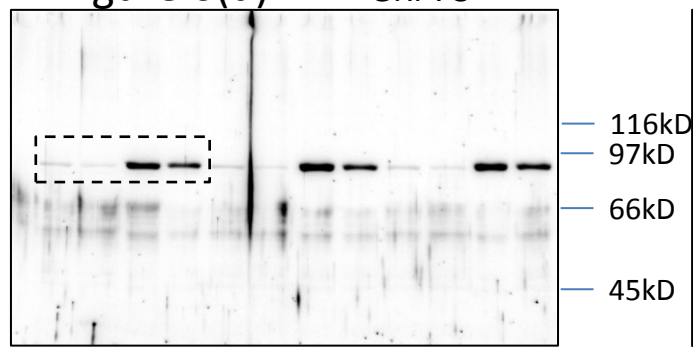

Figure 6(d)

Erk1/2

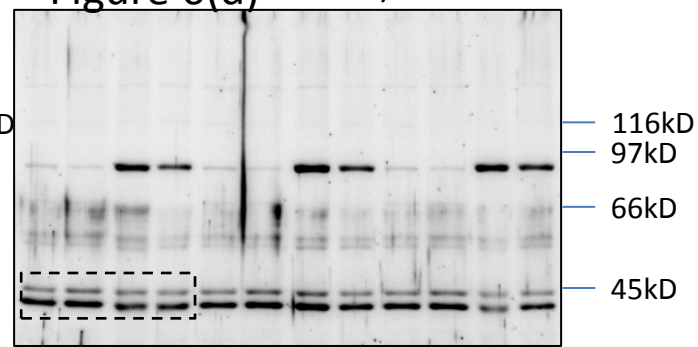

Figure 6(e)

CHOP

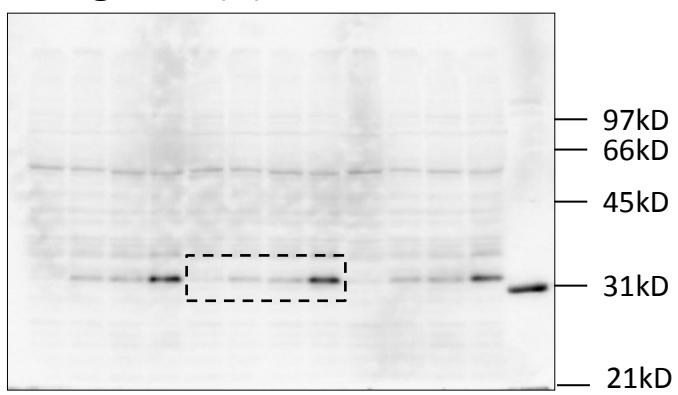

Figure 6(e)

Erk1/2

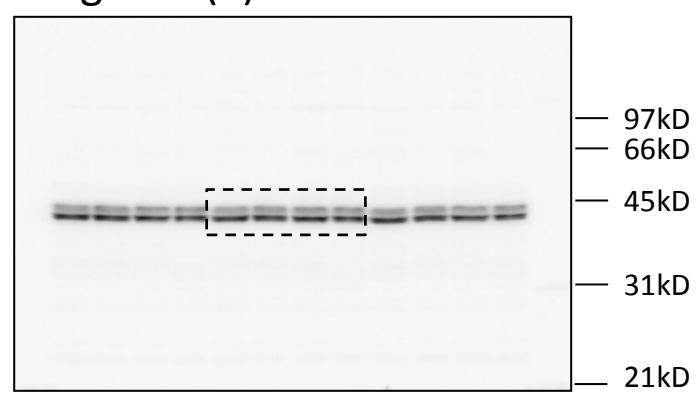

Figure 6(f)

GRP78

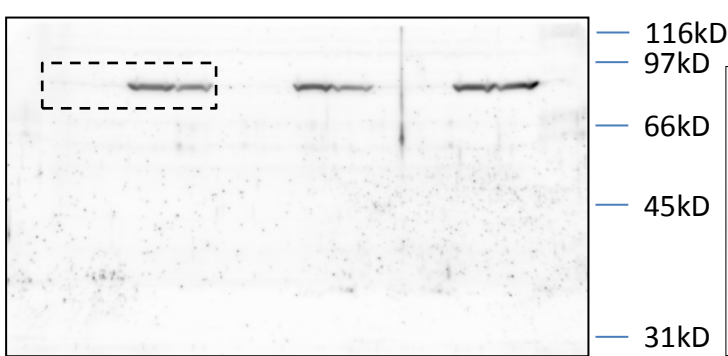

Figure 6(f)

Erk1/2

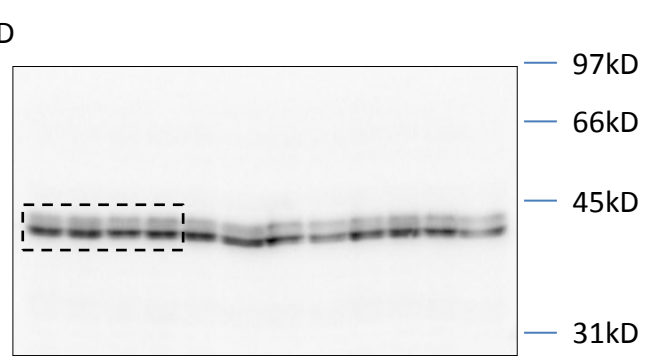

Supplement: 41598_2018_25340_MOESM2_ESM.pdf [file 41598_2018_25340_MOESM2_ESM.pdf]
